# Supplementary material for: Benthic Macrofauna Community Bioirrigation Potential (BIPc): Regional Map and Utility Validation for the South-Western Baltic Sea
Source: MDPI journal article supplement (doi:10.3390/biology11071085), 2022-07-20
Supplement: s1 [file s1]

# SUPPLEMENTARY MATERIAL

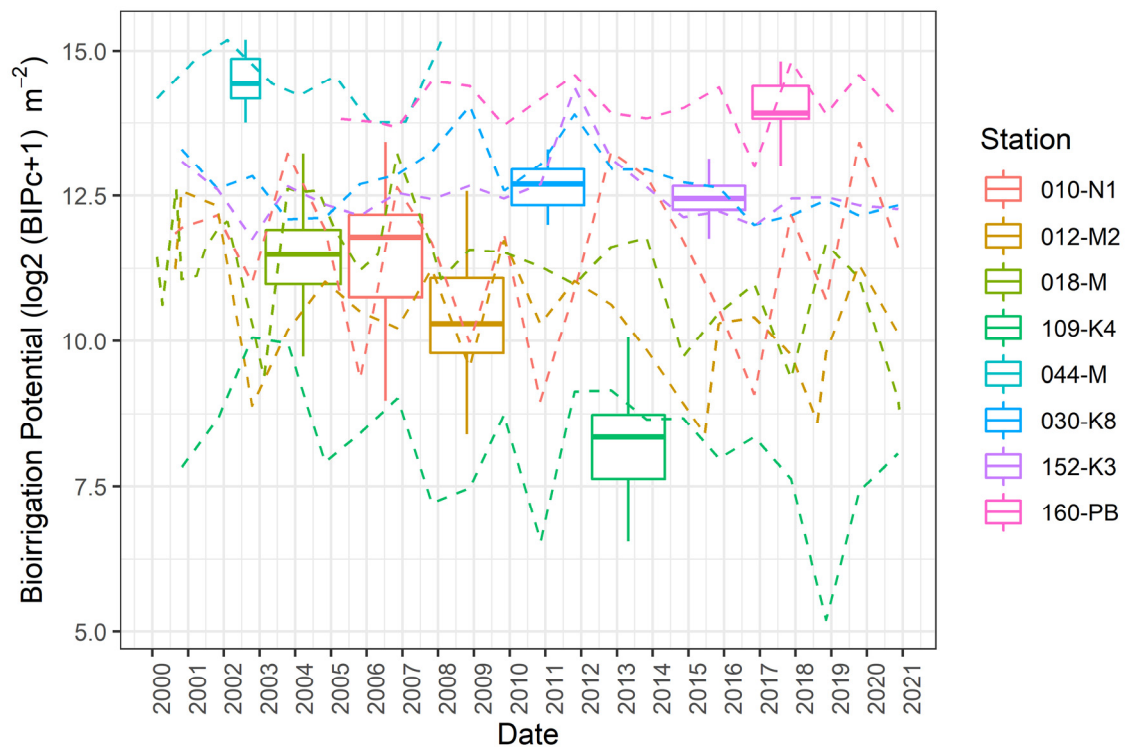

**Figure S1.** Figure showing time-series of BIPc values at 8 monitoring stations.

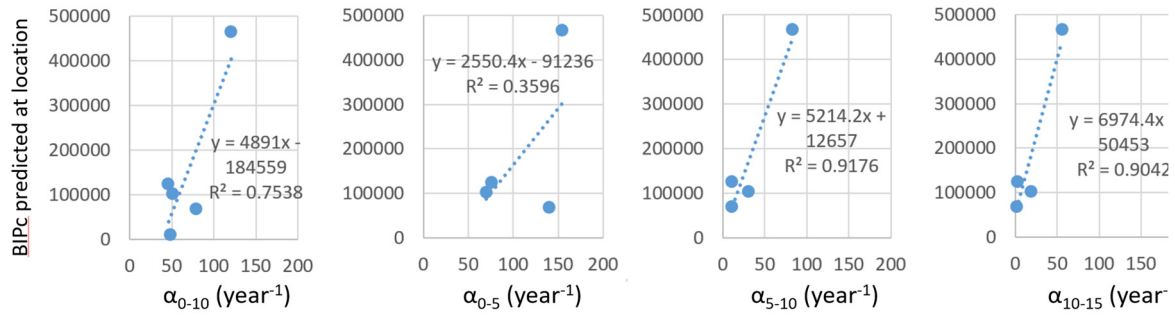

Irrigation rate constants integrated for corresponding sediment depth interval (in cm) from Powilleit and Forster (2018).

(a)

|                                                                         | Pearson correlations coefficients<br>(n=14) |                                                   | Corresponding p-values                                             |           |                                              |                                 |       |                                         |                               |                                      |                                               |  |  |  |
|-------------------------------------------------------------------------|---------------------------------------------|---------------------------------------------------|--------------------------------------------------------------------|-----------|----------------------------------------------|---------------------------------|-------|-----------------------------------------|-------------------------------|--------------------------------------|-----------------------------------------------|--|--|--|
|                                                                         | Inventory Br mmol/m <sup>2</sup>            | Irrigation L/(m <sup>2</sup> d) entire core depth | Irrigation L/(m <sup>2</sup> d) in 2 to 10 cm sediment depth layer | BIPc diff | BIPc diff in 2 to 10 cm sediment depth layer | BIPc (adv scores in fine sands) | BIPc  | BIPc in 2 to 10 cm sediment depth layer | Abundance, ind/m <sup>2</sup> | Wet weight biomass, g/m <sup>2</sup> | Ash free dry weight biomass, g/m <sup>2</sup> |  |  |  |
| Inventory Br mmol/m <sup>2</sup>                                        |                                             | 0.938                                             | 0.859                                                              | 0.425     | 0.396                                        | 0.365                           | 0.429 | 0.383                                   | 0.278                         | 0.303                                | 0.320                                         |  |  |  |
| Irrigation L/(m <sup>2</sup> d) entire core depth                       | 0.000                                       |                                                   | 0.897                                                              | 0.350     | 0.366                                        | 0.148                           | 0.301 | 0.320                                   | 0.118                         | 0.301                                | 0.305                                         |  |  |  |
| Irrigation L/(m <sup>2</sup> d) in 2 to 10 cm sediment depth layer      | 0.000                                       | 0.000                                             |                                                                    | 0.181     | 0.200                                        | 0.109                           | 0.093 | 0.109                                   | 0.078                         | 0.170                                | 0.170                                         |  |  |  |
| BIPc diff                                                               | 0.130                                       | 0.220                                             | 0.535                                                              |           | 0.945                                        | 0.474                           | 0.812 | 0.906                                   | 0.112                         | 0.912                                | 0.931                                         |  |  |  |
| BIPc diff in 2 to 10 cm sediment depth layer                            | 0.162                                       | 0.199                                             | 0.492                                                              | 0.000     |                                              | 0.255                           | 0.637 | 0.909                                   | -0.176                        | 0.971                                | 0.977                                         |  |  |  |
| BIPc (adv scores in fine sands)                                         | 0.199                                       | 0.612                                             | 0.710                                                              | 0.087     | 0.378                                        |                                 | 0.599 | 0.283                                   | 0.771                         | 0.134                                | 0.171                                         |  |  |  |
| BIPc                                                                    | 0.126                                       | 0.296                                             | 0.752                                                              | 0.000     | 0.014                                        | 0.024                           |       | 0.805                                   | 0.532                         | 0.551                                | 0.596                                         |  |  |  |
| BIPc in 2 to 10 cm sediment depth layer                                 | 0.177                                       | 0.264                                             | 0.711                                                              | 0.000     | 0.000                                        | 0.326                           | 0.001 |                                         | -0.040                        | 0.843                                | 0.866                                         |  |  |  |
| Abundance, ind/m <sup>2</sup>                                           | 0.337                                       | 0.688                                             | 0.790                                                              | 0.704     | 0.548                                        | 0.001                           | 0.050 | 0.893                                   |                               | -0.269                               | -0.226                                        |  |  |  |
| Wet weight biomass, g/m <sup>2</sup>                                    | 0.293                                       | 0.296                                             | 0.560                                                              | 0.000     | 0.000                                        | 0.649                           | 0.041 | 0.000                                   | 0.353                         |                                      | 0.998                                         |  |  |  |
| Ash free dry weight biomass, g/m <sup>2</sup>                           | 0.265                                       | 0.290                                             | 0.562                                                              | 0.000     | 0.000                                        | 0.559                           | 0.025 | 0.000                                   | 0.437                         | 0.000                                |                                               |  |  |  |
| Wet weight biomass in 2 to 10 cm sediment depth layer, g/m <sup>2</sup> | 0.310                                       | 0.289                                             | 0.514                                                              | 0.000     | 0.000                                        | 0.822                           | 0.083 | 0.000                                   | 0.215                         | 0.000                                | 0.000                                         |  |  |  |

(b)

**Figure S2.** Correlations of BIPc values with measured bioirrigation rates. **(a)** Correlations of predicted BIPc values with bioirrigation constants resulting from bromide tracer experiments estimated for various depth intervals, as reported in Powilleit and Forster (2018). **(b)** Pearson correlation coefficients (above the diagonal) with significance levels ( $p$ -value below the diagonal) calculated between bioirrigation intensity measured with bromide tracer and macrofauna-based parameters. **(a)** Predicted BIPc values at corresponding locations plotted against bioirrigation constants resulting from bromide tracer experiments reported in Powilleit and Forster (2018) for various depth intervals.
